# Supplementary material for: Cardiovascular Toxicity of Immune Checkpoint Inhibitors: A Guide for Clinicians
Source: PubMed Central journal article supplement — Drug Saf. 2023 Jun 21;46(9):819–33. doi: 10.1007/s40264-023-01320-5 (PMC10442274; doi:10.1007/s40264-023-01320-5), 2023-06-21
Supplement: 40264_2023_1320_MOESM1_ESM.pdf [file 40264_2023_1320_MOESM1_ESM.pdf]

## Cardiovascular Toxicity of Immune Checkpoint Inhibitors

Emanuel Raschi<sup>1</sup>, Simone Rossi<sup>2,3</sup>, Andrea De Giglio<sup>1,4</sup>, Michele Fusaroli<sup>1</sup>, Flavio Burgazzi<sup>1</sup>, Rita Rinaldi<sup>2</sup>, Luciano Potena<sup>5</sup>

<sup>1</sup>Department of Medical and Surgical Sciences, *Alma Mater Studiorum* - University of Bologna, Bologna, Italy

<sup>2</sup>IRCCS Istituto delle Scienze Neurologiche di Bologna, Bologna, Italy

<sup>3</sup>Department of Biomedical and Neuromotor Sciences (DIBINEM), *Alma Mater Studiorum* - University of Bologna, Bologna, Italy.

<sup>4</sup>Medical Oncology, IRCCS Azienda Ospedaliero-Universitaria di Bologna, Bologna, Italy

<sup>5</sup>Unit of Heart Failure and Transplantation, IRCCS Azienda Ospedaliero-Universitaria di Bologna, Bologna, Italy.

### Correspondence:

Emanuel Raschi, MD, PhD

Pharmacology Unit - Department of Medical and Surgical Sciences

*Alma Mater Studiorum* - University of Bologna

Via Irnerio 48, 40126, Bologna, Italy

Phone: +39 051 2091802

e-mail: [emanuel.raschi@unibo.it](mailto:emanuel.raschi@unibo.it)

ORCID: 0000-0003-0487-7996

## Electronic Supplementary Material

### Methods for article selection

|                                                  |                                                                                                                                                                                                                                                                                                                                                       |
|--------------------------------------------------|-------------------------------------------------------------------------------------------------------------------------------------------------------------------------------------------------------------------------------------------------------------------------------------------------------------------------------------------------------|
| <b>Date of search</b>                            | December 20 <sup>th</sup> , 2022                                                                                                                                                                                                                                                                                                                      |
| <b>Database search</b>                           | Medline-Pubmed                                                                                                                                                                                                                                                                                                                                        |
| <b>Search criteria</b>                           | Combinations of keywords (immune checkpoint inhibitors, checkpoint inhibitors, checkpoint blockade, cardiotoxicity, cardiovascular toxicity, cardio-oncology, myocarditis)                                                                                                                                                                            |
| <b>Inclusion criteria</b>                        | Articles in humans dealing with cardiovascular toxicity with immune checkpoint inhibitors (epidemiology, diagnosis, assessment, surveillance, management).<br><br>Both original and review articles were considered.<br><br>Review articles were used for snowballing.                                                                                |
| <b>Exclusion criteria</b>                        | Articles not in English                                                                                                                                                                                                                                                                                                                               |
| <b>Criteria to prioritize pertinent articles</b> | Guidelines by major scientific societies (ESC, ASCO, ESMO, NCCN, SITC).<br><br>Articles published in major cardiological (NEJM, Lancet, Circulation, JACC, JACC CardioOncology, EHJ) and oncology Journals (Lancet Oncology, JAMA Oncology, JCO, Ann Oncol, EJC, Journal for Immunotherapy of Cancer).<br><br>Articles published in the last 5 years. |
